# Supplementary material
Source: PubMed Central journal article supplement (PMC6688505)
Supplement: NIHMS1531555-supplement-2.pdf [file NIHMS1531555-supplement-2.pdf]

Addgene NGS Result

GTCGACATTGATTATTGACTAGTTATTAATAGTAATCAATTACGGGGTCATTAGTTCATAGCCCATATA  
TGGAGTTCCGCGTTACATAACTTACGGTAAATGGCCCCCTGGCTGACCGCCCAACGACCCCCGCCA  
TTGACGTCAATAATGACGTATGTTCCCATAGTAACGCCAATAGGGACTTTCCATTGACGTCAATGGGT  
GGAGTATTTACGGTAAACTGCCCACTTGGCAGTACATCAAGTGTATCATATGCCAAGTACGCCCCCTA  
TTGACGTCAATGACGGTAAATGGCCCCCTGGCATTATGCCCAGTACATGACCTTATGGGACTTTCCTA  
CTTGGCAGTACATCTACGTATTAGTCATCGCTATTACCATGGTCGAGGTGAGCCCCACGTTCTGCTTCA  
CTCTCCCCATCTCCCCCCCCCTCCCCACCCCAATTTTGTATTTATTTATTTTTTAATTATTTTGTGCAGCG  
ATGGGGGCGGGGGGGGGGGGGGGGGCGCGGGGCGGGGCGGGGCGGGGCGGRGRGGGGCGGCGCRGC  
CAATCAGAGCGGCGCGCTCCGAAAGTTTCTTTTATGGCGAGGCGGCGGGCGGCGGCCCTATAAAA  
AGCGAAGCGCGCGGGCGGGAGTCGCTGCGCGCTGCCTTCGCCCGTGCCCGCTCCGCCGCCGCC  
TCGCGCCCGCCCGCCCGCTCTGACTGACCGCGTACTCCCACAGGTGAGCGGGCGGGACGGCCCTTC  
TCCTCCGGGCTGTAATTAGCGCTTGGTTTAAATGACGGCTTGTTCCTTTCTGTGGCTGCGTGAAAGCCTT  
GAGGGGCTCCGGGAGGGCCCTTTGTGCGGGGGAGCGGCTCGGGGGGTGCGTGCGTGTGTGTGCG  
TGGGGAGCGCCCGTGC GGCTCCGCGCTGCCCGGCGGCTGTGAGCGCTGCGGGCGCGGGCGGGGCT  
TTGTGCGCTCCGCAGTGTGCGCGAGGGGAGCGCGGCCGGGGGCGGTGCCCGCGGTGCGGGGGGGG  
TGCGAGGGGAACAAAGGCTGCGTGCGGGGTGTGTGCGKGGGGGGGTGAGCAGGGGGTGTGGGCGCGT  
CGGTGCGGCTGCAACCCCCCTGCACCCCCCTCCCCGAGTTGCTGAGCACGGCCCGGCTTCGGGTGCG  
GGGCTCCGTACGGGGCGTGGCGCGGGGCTCGCCGTGCCGGGCGGGGGGTGGCGGCAGGTGGGGGTGC  
CGGGCGGGGCGGGGGCCCTCGGGCCGGGGAGGGCTCGGGGGAGGGGCGCGGGCGGCCCCCGGAGCG  
CCGGCGGCTGTGAGGGCGCGGGGAGCCGAGCCATTGCCTTTTATGGTAATCGTGCGAGAGGGGCGAG  
GGACTTCTTTGTCCCAAATCTGTGCGGAGCCGAAATCTGGGAGGCGCCCGCCGACCCCCCTAGCGG  
GCGCGGGGCGAAGCGGTGCGGCGCCGGCAGGAAGGAAATGGGCGGGGAGGGCCTTCGTGCGTCGCCG  
CGCCCGCTCCCTTCTCCCTCTCCAGCCTCGGGGCTGTCCGCGGGGGACGGCTGCCTTCGGGGGGG  
ACGGGGCAGGGCGGGGTTTCGGCTTCTGGCGTGTGACCGGCGGCTCTAGAGCCTCTGCTAACCATGTT  
ATGCCTTCTTCTTTTCTACAGCTCCTGGGCAACGTGCTGGTTATTGTGCTGTCTCATCATTTTGGCAA  
AGAATTCAGGTACCGATAGCTTGCCATGCTGCCCGTTTGGCACTGCTCCTGCTGGCCGCTTGACGG  
CTCGGGCGCTGGAGGTACCCACTGATGGTAATGCTGGCCTGCTGGCTGAACCCAGATTGCCATGTT  
TGTGGCAGACTGAACATGACATGAATGTCCAGAATGGGAAGTGGGATTGAGATCCATCAGGGACCAA  
AACCTGCATTGATACCAAGGAAGGCATCCTGCAGTATTGCCAAGAAGTCTACCCTGAACTGCAGATCAC  
CAATGTGGTAGAAGCCAACCAACAGTGACCATCCAGAAGTGGTGAAGCGGGCCGCAAGCAGTGAAGACC  
ATCCCCTTTGTGATTCCCTACCGCTGCTTAGTTGGTGAAGTTGTAAGTGAAGTGCCTTCTCGTTCCGTAAGTGC  
AAATCTTACACCAGGAGAGGATGGATGTTTGCGAACTCATCTTACTGGCACACCGTCGCCAAAGAGACATGC  
AGTGAGAAGAGTACCAACTTGCATGACTACGGCATGTTGCTGCCCTGCGGAATTGACAAGTCCGAGGGGTAGAG  
TTTGTGTGTTGCCACTGGCTGAAGAAAGTGACAATGTGGATTCTGCTGATGCGGAGGAGGATGACTCGGATGTCT  
GGTGGGGCGGAGCAGACACAGACTATGCAGATGGGAGTGAAGACAAAGTAGTAGAAGTAGCAGAGGAGGAAGA  
AGTGGCTGAGGTGGAAGAAGAAGAAGCCGATGATGACGAGGACGATGAGGATGGTGTGAGGTAGAGGAAGAG  
GCTGAGGAACCTACGAAGAAGCCACAGAGAGAACCACCAGCATTGCCACCACCACCACCACCACAGAGTCT  
GTGGAAGAGGTGGTTCGAGTTCCTACAACAGCAGCCAGTACCCTGATGCCGTTGACAAGTATCTCGAGACACCTG  
GGATGAGAATGAACATGCCATTTCCAGAAAGCCAAAGAGAGGCTTGAGGCCAAGCACCAGAGAGAAATGTC  
CAGGTCATGAGAGAATGGGAAGAGGAGCAGAACGTCAAGCAAAGAACTTGCCTAAAGCTGATAAGAAGGCAGTTAT  
CCAGCATTCCAGGAGAAAGTGAATCTTTGGAACAGGAAGCAGCCAACGAGAGACAGCAGCTGGTGGAGACAC  
ACATGGCCAGAGTGAAGCCATGCTCAATGACCGCCGCCGCTGGCCCTGGAGAACTACATCACCGCTCTGCAGG  
CTGTTCTCTCGGCCCTCGTCACGTGTTCAATATGCTAAAGAAGTATGTCCGCGCAGAACAGAAGGACAGACAGCA  
CACCTAAAGCATTTCGAGCATGTGCGCATGGTGGATCCAAGAAAGCCGCTCAGATCCGGTCCAGGTTATGAC  
ACACCTCCGTGTGATTATGAGCGCATGAATCAGTCTCTCTCCCTGCTCTACAACGTGCCTGCAGTGGCCGAGGAG  
ATTCAGGATGAAGTTGATGAGCTGCTTCAGAAAGAGCAAACTATTGAGATGACGCTTGGCCAACATGATTAGTG  
AACCAAGGATCAGTTACGGAACGATGCTCTCATGCCATCTTTGACCGAAACGAAAACCACCGTGGAGCTCCTCC  
CGTGAATGGAGAGTTCAGCCTGGACGATCTCCAGCCGTGGCATTCTTTTGGGGCTGACTCTGTGCCAGCCAACACA  
GAAAACGAAGTTGAGCCTGTTGATGCCCGCCCTGCTGCCGACCGAGGACTGACCACTCGACCAGGTTCTGGGTTG  
ACAAATATCAAGACGGAGGAGATCTCTGAAGTGAATCTGGATGCAGAATCCGACATGACTCAGGATATGAAGTT  
CATCATCAAAAATTGGTGTCTTTGCAGAAGATGTGGGTTCAAACAAAGGTGCAATCATTGGACTCATGGTGGGGC  
GTGTTGTCATAGCGACAGTATCTTCATCACCTTGGTGTGCTGAAGAAGAAACAGTACACATCCATTATCATG  
TGTGGTGGAGGTTGACGCCGCTGTACCCAGAGGAGCGCCACCTGTCCAAGATGCAGCAGAACGGCTACGAAAA

TCCAACCTACAAGTTCTTTGAGCAGATGCAGAACTAGGATATCGCGGCCCGCTCGAGAGATCTTTTTCCCTCTGCC  
AAAAATTATGGGGACATCATGAAGCCCCTTGAGCATCTGACTTCTGGCTAATAAAGGAAATTTATTTTCATTGCAA  
TAGTGTGTTGGAATTTTTGTGTCTCTACTCGGAAGGACATATGGGAGGGCAAATCATTAAAAACATCAGAATGA  
GTATTTGGTTTAGAGTTTGGCAACATATGCCCATATGCTGGCTGCCATGAACAAAGGTTGGCTATAAAGAGGTCAT  
CAGTATATGAAACAGCCCCCTGCTGTCCATTCCTTATCCATAGAAAAGCCTTGACTTGAGGTTAGATTTTTTTTAT  
ATTTTGTTTTGTGTTATTTTTTTCTTTAACATCCCTAAAAATTTTCCTTACATGTTTTACTAGCCAGATTTTTCTCCTC  
TCCTGACTACTCCCAGTCATAGCTGTCCCTCTTCTCTTATGGAGATCCCTCGACCTGCAGCCCAAGCTTGGCGTAAT  
CATGGTCATAGCTGTTTCTGTGTGAAAATTGTTATCCGCTCACAATTCCACACAACATACGAGCCGGAAGCATAAA  
GTGTAAGCCTGGGGTGCCATAATGAGTGAGCTAACTACATTAATTGCGTTGCGCTCACTGCCCGCTTTCCAGTCG  
GGAAACCTGTCGTGCCAGCGGATCCGCATCTCAATTAGTCAGCAACCATAGTCCCGCCCCTAACTCCGCCATCCC  
GCCCTAACTCCGCCAGTCCGCCATTTCTCCGCCCATGGCTGACTAATTTTTTTTATTTATGCAGAGGCCGAGG  
CCGCCTCGGCCTCTGAGCTATTCCAGAAGTAGTGAGGAGGCTTTTTTGGAGGCCTAGGCTTTTGA AAAAAGCTAAC  
TTGTTTATTGCAGCTTATAATGGTTACAAATAAAGCAATAGCATCACAAATTTACAAATAAAGCATTTTTTTCACT  
GCATTCTAGTTGTGGTTTGTCCAACTCATCAATGTATCTTATCATGTCTGGATCCGCTGCATTAATGAATCGGCCA  
ACGCGCGGGGAGAGGGCGGTTTGCATTTGGGCGCTCTCCGCTCCTCGCTCACTGACTCGCTGCGCTCGGTCGTT  
CGGCTGCGGCGAGCGGTATCAGCTCAAAAGGCGGTAATACGGTTATCCACAGAATCAGGGGATAACGCAGGA  
AAGAACATGTGAGCAAAGGCCAGCAAAGGCCAGGAACCGTAAAAAGGCCGCGTTGCTGGCGTTTTTCCATAGG  
CTCCGCCCCCTGACGAGCATCACAAAAATCGACGCTCAAGTCAGAGGTGGCGAAACCCGACAGGACTATAAAGA  
TACCAGGCGTTTCCCCCTGGAAGCTCCCTCGTGCGCTCCTGTTCCGACCCTGCCGCTTACCGGATACCTGTCCGC  
CTTTCTCCCTTCGGGAAGCGTGGCGCTTTCTCATAGCTCACGCTGTAGGTATCTCAGTTCCGGTGTAGGTCGTTCCGCT  
CCAAGCTGGGCTGTGTGCACGAACCCCCCGTTACGCCGACCGCTGCGCCTTATCCGGTAACATATCGTCTTGAGTC  
CAACCCGGTAAGACACGACTTATCGCCACTGGCAGCAGCCACTGGTAACAGGATTAGCAGAGCGAGGTATGTAGG  
CGGTGCTACAGAGTTCTTGAAGTGGTGGCCTAACTACGGCTACACTAGAAGAACAGTATTTGGTATCTGCGCTCTG  
CTGAAGCCAGTTACCTTCGGAAAAAGAGTTGGTAGCTCTTGATCCGGCAAACAACACCACCGTGGTAGCGGTG  
TTTTTGTGCAAGCAGCAGATTACGCGCAGAAAAAAGGATCTCAAGAAGATCCTTTGATCTTTTCTACGGGGTC  
TGACGCTCAGTGGAACGAAAACACTCAGTTAAGGGATTTTGGTCATGAGATTATCAAAAAGGATCTTACCTAGATC  
CTTTAAATTA AAAAATGAAGTTTTAAATCAATCTAAAGTATATATGAGTAAACTTGGTCTGACAGTTACCAATGCTT  
AATCAGTGAGGCACCTATCTCAGCGATCTGTCTATTTTCGTTCCATCCATAGTTGCCTGACTCCCCGTCGTGTAGATAA  
CTACGATACGGGAGGGCTTACCATCTGGCCCCAGTGCTGCAATGATACCGCGAGACCCACGCTCACCGGCTCCAG  
ATTTATCAGCAATAAACCAGCCAGCCGGAAGGGCCGAGCGCAGAAGTGGTCTGCAACTTTATCCGCTCCATCC  
AGTCTATTAATTGTTGCCGGGAAGCTAGAGTAAGTAGTTCGCCAGTTAATAGTTTGCGCAACGTTGTTGCCATTGCT  
ACAGGCATCGTGGTGTACGCTCGTCTGTTGGTATGGCTTATTAGCTCCGGTTCCCAACGATCAAGGCGAGTTA  
CATGATCCCCATGTTGTGCAAAAAGCGGTTAGCTCCTTCGGTCTCCGATCGTTGTCAGAAGTAAGTTGGCCGC  
AGTGTATCACTCATGGTTATGGCAGCACTGCATAATTCTCTTACTGTATGCCATCCGTAAGATGCTTTTTCTGTGA  
CTGGTGAGTACTCAACCAAGTCATTCTGAGAATAGTGTATGCGGCGACCGAGTTGCTCTTGCCCGCGTCAATACG  
GGATAATACCGCGCCACATAGCAGAACTTTAAAAGTGCTCATCATTGGAAAACGTTCTTCGGGGCGAAAACCTCTCA  
AGGATCTTACCGCTGTTGAGATCCAGTTCGATGTAACCCACTCGTGCACCCAACCTGATCTTCAGCATCTTTACTTT  
CACCAGCGTTTCTGGGTGAGCAAAAACAGGAAGGCAAAATGCCGCAAAAAGGGAATAAAGGGCGACACGGAAAT  
GTTGAATACTCATACTCTCTTTTTCAATATTATTGAAGCATTATCAGGGTTATTGTCTCATGAGCGGATACATA  
TTTGAATGATTTAGAAAAATAACAAATAGGGGTTCCGCGCACATTTCCCCGAAAAGTGCCACCTGG
