# Supplementary material
Source: PubMed Central journal article supplement (PMC6688505)
Supplement: NIHMS1531555-supplement-4.pdf [file NIHMS1531555-supplement-4.pdf]

1962-67                      4769-74                      6319-24  
Mutant APP cDNA .....CTGA**ACTGCA**GATC....TTTC**ACTGCA**TTCT....AGC**ACTGCA**TAAAT.....  
MiR-455-3p            3'....ACT**GACGTA**-5'    3'....ACT**GACGTA**-5'    3'....ACT**GACGTA**-5'
