# Supplementary material
Source: PubMed Central journal article supplement (PMC6688505)

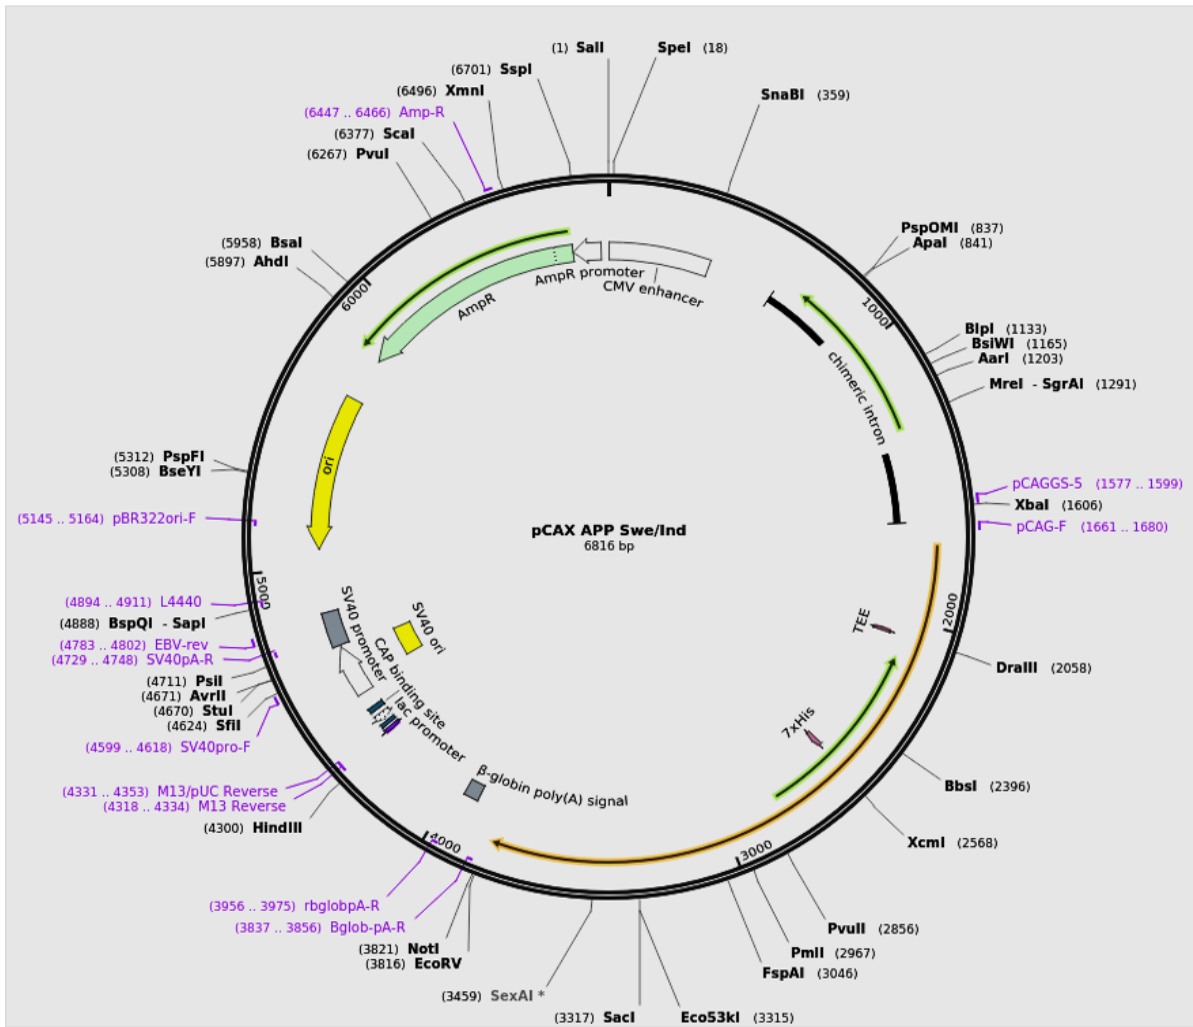

Supplement: NIHMS1531555-supplement-1.pdf [file NIHMS1531555-supplement-1.pdf]

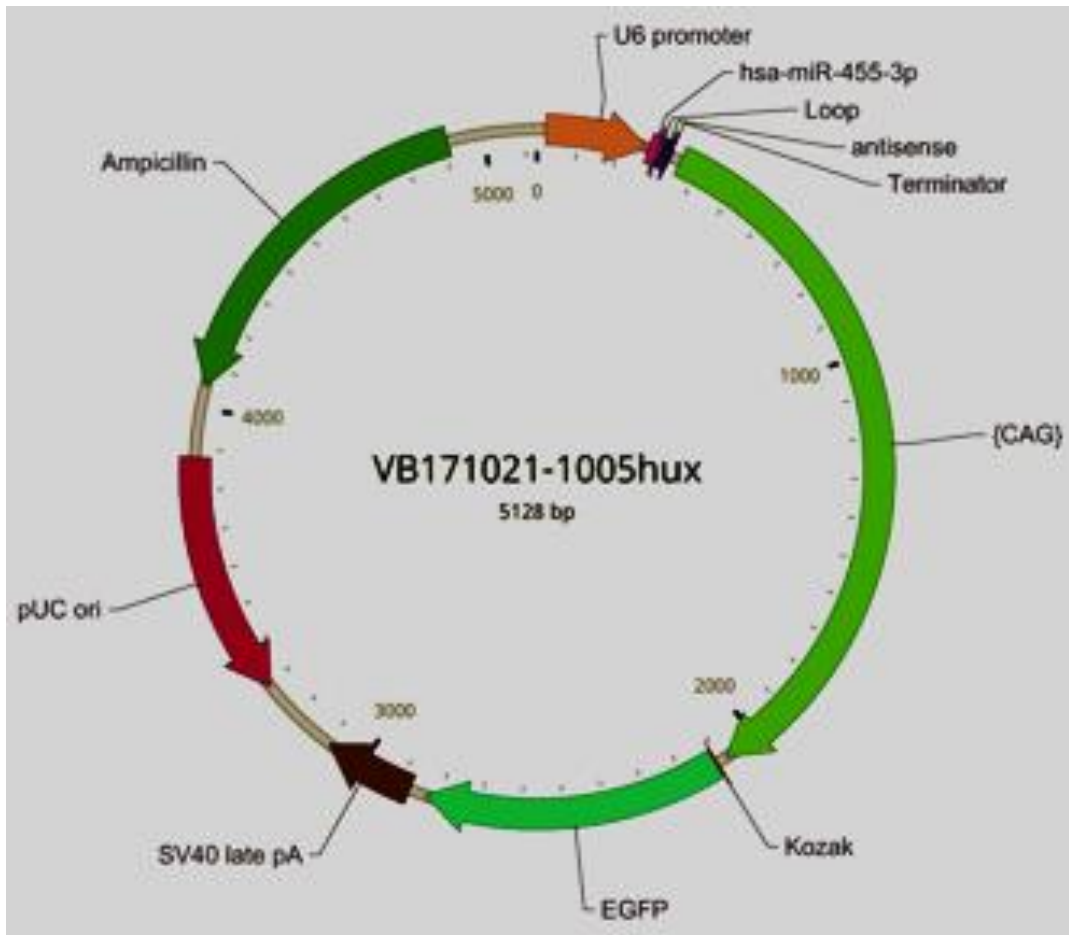

Supplement: NIHMS1531555-supplement-3.pdf [file NIHMS1531555-supplement-3.pdf]
